# Supplementary material
Source: publisher site journal article supplement (https://www.dovepress.com/article/581333)
Supplement: Supplementary file 1 [file 581333%20Supplementary%20Tables.docx]

**Table S1** Characteristics of the carbapenem-resistant *Klebsiella pneumoniae* infections in the control group

| Patient number | 1 | 2 | 3 | 4 | 5 | 6 | 7 | 8 | 9 | 10 |
| --- | --- | --- | --- | --- | --- | --- | --- | --- | --- | --- |
| Time of BSI | POD35 | POD3 | POD1 | POD7 | POD0 | POD1 | POD21 | POD5 | POD34 | POD10 |
| Time to detection of positive blood culture (min) | 668 | 623 | 757 | 562 | 670 | 577 | 545 | 605 | 1110 | 783 |
| Piperacillin/tazobactam | ≥128,R | ≥128,R | ≥128,R | ≥128,R | ≥128,R | ≥128,R | ≥128,R | ≥128,R | ≥128,R | ≥128,R |
| Cefazolin | ≥64,R | ≥64,R | ≥64,R | ≥64,R | ≥64,R | ≥64,R | N/A | N/A | N/A | N/A |
| Cefotetan | 32,I | ≥64,R | ≥64,R | ≥64,R | N/A | ≥64,R | N/A | N/A | N/A | N/A |
| Ceftazidime | 16,R | ≥64,R | ≥64,R | ≥64,R | ≥64,R | ≥64,R | ≥64,R | ≥64,R | ≥64,R | ≥64,R |
| Ceftriaxone | ≥64,R | ≥64,R | ≥64,R | ≥64,R | N/A | ≥64,R | N/A | N/A | N/A | N/A |
| Cefepime | ≥64,R | ≥64,R | ≥64,R | ≥64,R | ≥32,R | ≥64,R | ≥32,R | ≥32,R | ≥32,R | ≥32,R |
| Aztreonam | ≥64,R | ≥64,R | ≥64,R | ≥64,R | ≥64,R | ≥64,R | ≥64,R | ≥64,R | 32,R | ≥64,R |
| Imipenem | ≥16,R | ≥16,R | ≥16,R | ≥16,R | ≥16,R | ≥16,R | ≥16,R | ≥16,R | ≥16,R | ≥16,R |
| Amikacin | 8,S | ≥64,R | ≥64,R | ≥64,R | ≥64,R | ≥64,R | 4,S | 8,S | ≥64,R | ≤2,S |
| Gentamicin | ≥16,R | ≥16,R | ≥16,R | ≥16,R | N/A | ≥16,R | N/A | N/A | N/A | N/A |
| Tobramycin | ≥16,R | ≥16,R | ≥16,R | ≥16,R | ≥16,R | ≥16,R | ≥16,R | ≥16,R | ≥16,R | ≥,R |
| Ciprofloxacin | ≥4,R | ≥4,R | ≥4,R | ≥4,R | ≥4,R | ≥4,R | ≥4,R | ≥4,R | ≥4,R | ≤1,S |
| Levofloxacin | ≥8,R | ≥8,R | ≥8,R | ≥8,R | ≥8,R | ≥8,R | ≥8,R | ≥8,R | ≥8,R | ≥8,R |
| Trimethoprim/Sulfanilamide | ≤20,S | ≥320,R | ≥320,R | ≥320,R | ≤20,S | ≥320,R | ≤20,S | ≥320,R | ≤20,S | ≤20,S |
| Cefoperazone/Sulbactam | 6,R* | 8,R* | 6,R* | 6,R* | ≥64,R | N/A | ≥64,R | ≥64,R | 32,R | ≥64,R |
| Fosfomycin | 21,S* | N/A | 16,S* | 17,S* | N/A | N/A | N/A | N/A | N/A | N/A |
| Tigecycline | 10,R* | N/A | 18,I* | 20,S* | N/A | 17,I* | 1,S* | 2,S* | 4,I* | ≥8,R |
| Polymyxin B | 15* | N/A | 13* | 14* | N/A | 15* | N/A | N/A | N/A | N/A |
| Colistin | N/A | N/A | N/A | N/A | N/A | N/A | ≤0.5,S | ≤0.5,S | ≤0.5,S | ≤0.5,S |

Antibiotic susceptibility testing was performed using an automatic microbial identification system (MIC, mg/L, VITEK® 2 Compact 60, France), except for * susceptibility testing performed using the Kirby-Bauer method (unit: mm). BSI: bloodstream infection; I: intermediate; N/A: none; POD: post-operation (liver transplantation) day; R: resistant; S: susceptible.

**Table S2** Characteristics of the carbapenem-resistant *Klebsiella pneumoniae* infections in the ceftazidime-avibactam-centered bundle therapy group

| Patient number | 1 | 2 | 3 | 4 | 5 | 6 | 7 | 8 | 9 | 10 | 11 | 12 | 13 | 14 | 15 |
| --- | --- | --- | --- | --- | --- | --- | --- | --- | --- | --- | --- | --- | --- | --- | --- |
| Time of BSI | POD5 | POD134 | POD1 | POD1 | POD3 | POD1 | POD2 | POD15 | POD1 | POD1 | POD0 | POD0 | POD166 | POD1 | POD3 |
| Time to detection of positive blood culture (min) | 587 | 649 | 753 | 526 | 837 | 679 | 625 | 817 | 494 | 870 | 676 | 763 | 764 | 674 | 593 |
| Piperacillin/tazobactam | ≥128,R | ≥128,R | ≥128,R | ≥128,R | ≥128,R | ≥128,R | ≥128,R | ≥128,R | ≥128,R | ≥128,R | ≥128,R | ≥128,R | ≥128,R | ≥128,R | ≥128,R |
| Cefazolin | ≥64,R | ≥64,R | ≥64,R | ≥64,R | N/A | N/A | ≥64,R | N/A | N/A | N/A | N/A | N/A | N/A | N/A | N/A |
| Cefotetan | ≥64,R | ≥64,R | ≥64,R | ≥64,R | N/A | N/A | N/A | N/A | N/A | N/A | N/A | N/A | N/A | N/A | N/A |
| Ceftazidime | ≥64,R | ≥64,R | ≥64,R | ≥64,R | ≥64,R | ≥64,R | ≥64,R | ≥64,R | ≥64,R | ≥64,R | ≥64,R | ≥64,R | ≥64,R | ≥64,R | ≥64,R |
| Ceftriaxone | ≥64,R | ≥64,R | ≥64,R | ≥64,R | N/A | N/A | ≥64,R | N/A | N/A | N/A | N/A | N/A | N/A | N/A | N/A |
| Cefepime | ≥64,R | ≥64,R | ≥64,R | ≥64,R | ≥32,R | ≥32,R | ≥32,R | ≥32,R | ≥32,R | ≥32,R | ≥32,R | ≥32,R | ≥32,R | ≥32,R | ≥32,R |
| Aztreonam | ≥64,R | ≥64,R | ≥64,R | ≥64,R | ≥64,R | ≥64,R | ≥64,R | ≥64,R | ≥64,R | ≥64,R | ≥64,R | ≥64,R | ≥64,R | ≥64,R | ≥64,R |
| Imipenem | ≥16,R | ≥16,R | 8,R | ≥16,R | ≥16,R | ≥16,R | ≥16,R | ≥16,R | ≥16,R | ≥8,R | ≥16,R | ≥16,R | ≥16,R | ≥16,R | ≥16,R |
| Amikacin | ≥64,R | 4,S | ≤2,S | ≥64,R | ≥64,R | 4,S | 16,S | 16,S | ≥64,R | 16,S | ≤2,S | ≤2,S | ≥64,R | ≥64,R | ≥64,R |
| Gentamicin | ≥16,R | ≥16,R | ≥16,R | ≥16,R | N/A | N/A | N/A | N/A | N/A | N/A | N/A | N/A | N/A | N/A | N/A |
| Tobramycin | ≥16,R | ≥16,R | ≥16,R | ≥16,R | ≥16,R | ≥16,R | N/A | ≥16,R | ≥16,R | ≥16,R | ≥16,R | ≤2,S | ≥16,R | ≥16,R | ≥16,R |
| Ciprofloxacin | ≥4,R | ≥4,R | ≥4,R | ≥4,R | ≥4,R | ≥4,R | N/A | ≥4,R | ≥4,R | ≥4,R | ≥4,R | ≥4,R | ≥4,R | ≥4,R | ≥4,R |
| Levofloxacin | ≥8,R | ≥8,R | 4,I | ≥8,R | ≥8,R | ≥8,R | ≥8,R | ≥8,R | ≥8,R | 4,R | ≥8,R | ≥8,R | ≥8,R | ≥8,R | ≥8,R |
| Trimethoprim/Sulfanilamide | ≥320,R | ≥20,R | ≤20,S | ≤20,S | ≤20,S | ≤20,S | ≤20,S | ≤20,S | ≥320,R | ≤20,S | ≥320,R | 40,S | ≥320,R | ≥320,R | ≥320,R |
| Cefoperazone/Sulbactam | 6,R* | 6,R* | 10,R* | ≥64,R | ≥64,R | ≥64,R | ≥64,R | ≥64,R | ≥64,R | ≥64,R | ≥64,R | ≥64,R | ≥64,R | ≥64,R | ≥64,R |
| Fosfomycin | 6,R* | N/A | N/A | N/A | N/A | N/A | N/A | N/A | N/A | N/A | N/A | N/A | N/A | N/A | N/A |
| Tigecycline | 20,S* | 19,S* | 15,I* | 2,S* | ≥8,R* | 1,S* | 1,S* | ≥8,R* | ≥8,R* | ≥8,R* | ≥8,R* | 2,S* | ≥8,R* | ≥8,R* | 2,S* |
| Polymyxin B | 15* | N/A | 14* | N/A | N/A | N/A | N/A | N/A | N/A | N/A | N/A | N/A | N/A | N/A | N/A |
| Colistin | N/A | N/A | N/A | ≤0.5,S | ≤0.5,S | ≤0.5,S | ≤0.5,S | ≤0.5,S | ≤0.5,S | ≤0.5,S | ≤0.5,S | 1,S | ≤0.5,S | ≤0.5,S | ≤0.5,S |

Antibiotic susceptibility testing was performed using an automatic microbial identification system (MIC, mg/L, VITEK® 2 Compact 60, France), except for * susceptibility testing performed using the Kirby-Bauer method (unit: mm). BSI: bloodstream infection; I: intermediate; N/A: none; POD: post-operation (liver transplantation) day; R: resistant; S: susceptible.
